# Supplementary material for: Are Citric Acid-Iron II Complexes True Chelates or Just Physical Mixtures and How to Prove This?
Source: MDPI journal article supplement (doi:10.3390/foods12020410), 2023-01-15
Supplement: s1 [file s1]

```

ONEWAY citricacidinsolution citricacidincrystal ironinsolution ironincrystal s
ulfateinsolution
      sulfateincrystal BY samplerep
/MISSING ANALYSIS
/POSTHOC=TUKEY ALPHA(0.05) .

```

## Oneway

### ANOVA

|                      |                | Sum of Squares | df | Mean Square | F      | Sig. |
|----------------------|----------------|----------------|----|-------------|--------|------|
| citricacidinsolution | Between Groups | 9.310          | 3  | 3.103       | 10.677 | .004 |
|                      | Within Groups  | 2.325          | 8  | .291        |        |      |
|                      | Total          | 11.636         | 11 |             |        |      |
| citricacidincrystal  | Between Groups | 120.392        | 3  | 40.131      | 73.078 | .000 |
|                      | Within Groups  | 4.393          | 8  | .549        |        |      |
|                      | Total          | 124.785        | 11 |             |        |      |
| ironinsolution       | Between Groups | 551.674        | 3  | 183.891     | 32.982 | .000 |
|                      | Within Groups  | 44.604         | 8  | 5.576       |        |      |
|                      | Total          | 596.278        | 11 |             |        |      |
| ironincrystal        | Between Groups | 4037.391       | 3  | 1345.797    | 2.110  | .177 |
|                      | Within Groups  | 5103.167       | 8  | 637.896     |        |      |
|                      | Total          | 9140.557       | 11 |             |        |      |
| sulfateinsolution    | Between Groups | 1572.860       | 3  | 524.287     | 7.828  | .009 |
|                      | Within Groups  | 535.837        | 8  | 66.980      |        |      |
|                      | Total          | 2108.697       | 11 |             |        |      |
| sulfateincrystal     | Between Groups | 1152.751       | 3  | 384.250     | .893   | .486 |
|                      | Within Groups  | 3444.134       | 8  | 430.517     |        |      |
|                      | Total          | 4596.885       | 11 |             |        |      |

## Post Hoc Tests

# Multiple Comparisons

Tukey HSD

| Dependent Variable   | (I) sample | (J) sample | Mean<br>Difference (I-J) | Std. Error | Sig.  | 95% Confidence Interval |             |
|----------------------|------------|------------|--------------------------|------------|-------|-------------------------|-------------|
|                      |            |            |                          |            |       | Lower Bound             | Upper Bound |
| citricacidinsolution | 11         | 12         | -.17420                  | .44019     | .978  | -1.5838                 | 1.2355      |
|                      |            | 21         | -2.09436*                | .44019     | .006  | -3.5040                 | -.6847      |
|                      |            | 23         | -.02389                  | .44019     | 1.000 | -1.4335                 | 1.3858      |
|                      | 12         | 11         | .17420                   | .44019     | .978  | -1.2355                 | 1.5838      |
|                      |            | 21         | -1.92017*                | .44019     | .010  | -3.3298                 | -.5105      |
|                      |            | 23         | .15030                   | .44019     | .985  | -1.2593                 | 1.5600      |
|                      | 21         | 11         | 2.09436*                 | .44019     | .006  | .6847                   | 3.5040      |
|                      |            | 12         | 1.92017*                 | .44019     | .010  | .5105                   | 3.3298      |
|                      |            | 23         | 2.07047*                 | .44019     | .007  | .6608                   | 3.4801      |
|                      | 23         | 11         | .02389                   | .44019     | 1.000 | -1.3858                 | 1.4335      |
|                      |            | 12         | -.15030                  | .44019     | .985  | -1.5600                 | 1.2593      |
|                      |            | 21         | -2.07047*                | .44019     | .007  | -3.4801                 | -.6608      |
| citricacidincrystal  | 11         | 12         | -2.71919*                | .60506     | .009  | -4.6568                 | -.7816      |
|                      |            | 21         | -8.02930*                | .60506     | .000  | -9.9669                 | -6.0917     |
|                      |            | 23         | -.57685                  | .60506     | .778  | -2.5145                 | 1.3608      |
|                      | 12         | 11         | 2.71919*                 | .60506     | .009  | .7816                   | 4.6568      |
|                      |            | 21         | -5.31011*                | .60506     | .000  | -7.2477                 | -3.3725     |
|                      |            | 23         | 2.14235*                 | .60506     | .031  | .2047                   | 4.0800      |
|                      | 21         | 11         | 8.02930*                 | .60506     | .000  | 6.0917                  | 9.9669      |
|                      |            | 12         | 5.31011*                 | .60506     | .000  | 3.3725                  | 7.2477      |
|                      |            | 23         | 7.45245*                 | .60506     | .000  | 5.5148                  | 9.3901      |
|                      | 23         | 11         | .57685                   | .60506     | .778  | -1.3608                 | 2.5145      |
|                      |            | 12         | -2.14235*                | .60506     | .031  | -4.0800                 | -.2047      |
|                      |            | 21         | -7.45245*                | .60506     | .000  | -9.3901                 | -5.5148     |
| ironinsolution       | 11         | 12         | .20000                   | 1.92796    | 1.000 | -5.9740                 | 6.3740      |
|                      |            | 21         | 15.99167*                | 1.92796    | .000  | 9.8177                  | 22.1657     |
|                      |            | 23         | .85000                   | 1.92796    | .970  | -5.3240                 | 7.0240      |
|                      | 12         | 11         | -.20000                  | 1.92796    | 1.000 | -6.3740                 | 5.9740      |
|                      |            | 21         | 15.79167*                | 1.92796    | .000  | 9.6177                  | 21.9657     |
|                      |            | 23         | .65000                   | 1.92796    | .986  | -5.5240                 | 6.8240      |
|                      | 21         | 11         | -15.99167*               | 1.92796    | .000  | -22.1657                | -9.8177     |
|                      |            | 12         | -15.79167*               | 1.92796    | .000  | -21.9657                | -9.6177     |
|                      |            | 23         | -15.14167*               | 1.92796    | .000  | -21.3157                | -8.9677     |
|                      | 23         | 11         | -.85000                  | 1.92796    | .970  | -7.0240                 | 5.3240      |
|                      |            | 12         | -.65000                  | 1.92796    | .986  | -6.8240                 | 5.5240      |
|                      |            | 21         | 15.14167*                | 1.92796    | .000  | 8.9677                  | 21.3157     |
| ironincrystal        | 11         | 12         | 18.16667                 | 20.62193   | .815  | -47.8720                | 84.2053     |
|                      |            | 21         | 45.91667                 | 20.62193   | .196  | -20.1220                | 111.9553    |
|                      |            | 23         | 2.16667                  | 20.62193   | 1.000 | -63.8720                | 68.2053     |
|                      | 12         | 11         | -18.16667                | 20.62193   | .815  | -84.2053                | 47.8720     |
|                      |            | 21         | 27.75000                 | 20.62193   | .563  | -38.2887                | 93.7887     |
|                      |            | 23         | -16.00000                | 20.62193   | .863  | -82.0387                | 50.0387     |
|                      | 21         | 11         | -45.91667                | 20.62193   | .196  | -111.9553               | 20.1220     |
|                      |            | 12         | -27.75000                | 20.62193   | .563  | -93.7887                | 38.2887     |
|                      |            | 23         | -43.75000                | 20.62193   | .225  | -109.7887               | 22.2887     |

### Multiple Comparisons

Tukey HSD

| Dependent Variable | (I) sample | (J) sample | Mean<br>Difference (I-J) | Std. Error | Sig.  | 95% Confidence Interval |             |
|--------------------|------------|------------|--------------------------|------------|-------|-------------------------|-------------|
|                    |            |            |                          |            |       | Lower Bound             | Upper Bound |
| sulfateinsolution  | 23         | 11         | -2.16667                 | 20.62193   | 1.000 | -68.2053                | 63.8720     |
|                    |            | 12         | 16.00000                 | 20.62193   | .863  | -50.0387                | 82.0387     |
|                    |            | 21         | 43.75000                 | 20.62193   | .225  | -22.2887                | 109.7887    |
|                    | 11         | 12         | -9.35758                 | 6.68229    | .533  | -30.7566                | 12.0415     |
|                    |            | 21         | 21.13128                 | 6.68229    | .053  | -.2678                  | 42.5303     |
|                    |            | 23         | -3.04184                 | 6.68229    | .967  | -24.4409                | 18.3572     |
|                    | 12         | 11         | 9.35758                  | 6.68229    | .533  | -12.0415                | 30.7566     |
|                    |            | 21         | 30.48886*                | 6.68229    | .008  | 9.0898                  | 51.8879     |
|                    |            | 23         | 6.31574                  | 6.68229    | .783  | -15.0833                | 27.7148     |
|                    | 21         | 11         | -21.13128                | 6.68229    | .053  | -42.5303                | .2678       |
|                    |            | 12         | -30.48886*               | 6.68229    | .008  | -51.8879                | -9.0898     |
|                    |            | 23         | -24.17312*               | 6.68229    | .028  | -45.5722                | -2.7741     |
|                    | 23         | 11         | 3.04184                  | 6.68229    | .967  | -18.3572                | 24.4409     |
|                    |            | 12         | -6.31574                 | 6.68229    | .783  | -27.7148                | 15.0833     |
|                    |            | 21         | 24.17312*                | 6.68229    | .028  | 2.7741                  | 45.5722     |
| sulfateincystal    | 11         | 12         | 9.56798                  | 16.94140   | .940  | -44.6844                | 63.8203     |
|                    |            | 21         | 22.57005                 | 16.94140   | .570  | -31.6823                | 76.8224     |
|                    |            | 23         | -2.32988                 | 16.94140   | .999  | -56.5822                | 51.9225     |
|                    | 12         | 11         | -9.56798                 | 16.94140   | .940  | -63.8203                | 44.6844     |
|                    |            | 21         | 13.00207                 | 16.94140   | .867  | -41.2503                | 67.2544     |
|                    |            | 23         | -11.89786                | 16.94140   | .893  | -66.1502                | 42.3545     |
|                    | 21         | 11         | -22.57005                | 16.94140   | .570  | -76.8224                | 31.6823     |
|                    |            | 12         | -13.00207                | 16.94140   | .867  | -67.2544                | 41.2503     |
|                    |            | 23         | -24.89993                | 16.94140   | .496  | -79.1523                | 29.3524     |
|                    | 23         | 11         | 2.32988                  | 16.94140   | .999  | -51.9225                | 56.5822     |
|                    |            | 12         | 11.89786                 | 16.94140   | .893  | -42.3545                | 66.1502     |
|                    |            | 21         | 24.89993                 | 16.94140   | .496  | -29.3524                | 79.1523     |

\*. The mean difference is significant at the 0.05 level.

## Homogeneous Subsets

**citricacidinsolution**

Tukey HSD<sup>a</sup>

| samplerep | N | Subset for alpha = 0.05 |        |
|-----------|---|-------------------------|--------|
|           |   | 1                       | 2      |
| 11        | 3 | 2.7176                  | 4.8120 |
| 23        | 3 | 2.7415                  |        |
| 12        | 3 | 2.8918                  |        |
| 21        | 3 |                         |        |
| Sig.      |   | .978                    | 1.000  |

Means for groups in homogeneous subsets are displayed.

a. Uses Harmonic Mean Sample Size = 3.000.

**citricacidincrystal**

Tukey HSD<sup>a</sup>

| samplerep | N | Subset for alpha = 0.05 |        |        |
|-----------|---|-------------------------|--------|--------|
|           |   | 1                       | 2      | 3      |
| 11        | 3 | 1.7742                  | 4.4934 | 9.8035 |
| 23        | 3 | 2.3510                  |        |        |
| 12        | 3 |                         |        |        |
| 21        | 3 |                         |        |        |
| Sig.      |   | .778                    | 1.000  | 1.000  |

Means for groups in homogeneous subsets are displayed.

a. Uses Harmonic Mean Sample Size = 3.000.

**ironinsolution**

Tukey HSD<sup>a</sup>

| samplerep | N | Subset for alpha = 0.05 |         |
|-----------|---|-------------------------|---------|
|           |   | 1                       | 2       |
| 21        | 3 | 12.7333                 | 27.8750 |
| 23        | 3 |                         |         |
| 12        | 3 |                         |         |
| 11        | 3 |                         |         |
| Sig.      |   | 1.000                   | .970    |

Means for groups in homogeneous subsets are displayed.

a. Uses Harmonic Mean Sample Size = 3.000.

### ironincrystal

Tukey HSD<sup>a</sup>

| samplerep | N | Subset for<br>alpha = 0.05 |
|-----------|---|----------------------------|
|           |   | 1                          |
| 21        | 3 | 126.0000                   |
| 12        | 3 | 153.7500                   |
| 23        | 3 | 169.7500                   |
| 11        | 3 | 171.9167                   |
| Sig.      |   | .196                       |

Means for groups in homogeneous subsets are displayed.

a. Uses Harmonic Mean Sample Size = 3.000.

### sulfateinsolution

Tukey HSD<sup>a</sup>

| samplerep | N | Subset for alpha = 0.05 |         |
|-----------|---|-------------------------|---------|
|           |   | 1                       | 2       |
| 21        | 3 | 24.7923                 |         |
| 11        | 3 | 45.9236                 | 45.9236 |
| 23        | 3 |                         | 48.9654 |
| 12        | 3 |                         | 55.2812 |
| Sig.      |   | .053                    | .533    |

Means for groups in homogeneous subsets are displayed.

a. Uses Harmonic Mean Sample Size = 3.000.

**sulfateincystal**

Tukey HSD<sup>a</sup>

| samplerep | N | Subset for<br>alpha = 0.05 |
|-----------|---|----------------------------|
|           |   | 1                          |
| 21        | 3 | 279.0697                   |
| 12        | 3 | 292.0718                   |
| 11        | 3 | 301.6398                   |
| 23        | 3 | 303.9696                   |
| Sig.      |   | .496                       |

Means for groups in homogeneous subsets are displayed.

a. Uses Harmonic Mean Sample Size = 3.000.
